# Supplementary material for: Shaping Silver Nanoparticles’ Size through the Carrier Composition: Synthesis and Antimicrobial Activity
Source: MDPI journal article supplement (doi:10.3390/nano13101585), 2023-05-09
Supplement: s1 [file s1]

# Electronic supplementary information

## Shaping silver nanoparticles size through the carrier composition: synthesis and antimicrobial activity

Margherita Cacaci <sup>1,2,†</sup>, Giacomo Biagiotti <sup>3,4,†</sup>, Gianluca Toniolo <sup>3,4</sup>, Martin Albino <sup>3,5</sup>, Claudio Sangregorio <sup>5</sup>,  
Mirko Severi <sup>3</sup>, Maura Di Vito <sup>1</sup>, Damiano Squitieri <sup>1</sup>, Luca Contiero <sup>6</sup>, Marco Paggi <sup>7</sup>, Marcello Marelli <sup>8</sup>,  
Stefano Cicchi <sup>3,4</sup>, Francesca Bugli <sup>1,2,\*</sup> and Barbara Richichi <sup>3,4,\*</sup>

<sup>1</sup> Dipartimento di Scienze Biotecnologiche di Base, Cliniche Intensivologiche e Perioperatorie, Università Cattolica del Sacro Cuore, 00168 Rome, Italy; margherita.cacaci@unicatt.it (M.C.); wdivit@gmail.com (M.D.V.); damiano.squitieri@unicatt.it (D.S.)

<sup>2</sup> Dipartimento di Scienze di Laboratorio e Infettivologiche, Fondazione Policlinico Universitario A. Gemelli IRCCS, 00168 Rome, Italy

<sup>3</sup> Department of Chemistry “Ugo Schiff”, University of Firenze, Via della Lastruccia 13, 50019 Sesto Fiorentino, Italy; giacomo.biagiotti@unifi.it (G.B.); gianlucatonio.vi@gmail.com (G.T.); martin.albino@unifi.it (M.A.); mirko.severi@unifi.it (M.S.); stefano.cicchi@unifi.it (S.C.)

<sup>4</sup> Consorzio Interuniversitario Nazionale per la Scienza e Tecnologia dei Materiali (INSTM), 50121 Firenze, Italy

<sup>5</sup> ICCOM CNR, Via Madonna del Piano 10, 50019 Sesto Fiorentino, Italy; csangregorio@iccom.cnr.it

<sup>6</sup> Cromology Italia S.p.A., Z.I. Porcari, 55016 Lucca, Italy; luca.contiero@cromology.it

<sup>7</sup> IMT School for Advanced Studies Lucca, Piazza San Francesco 19, 55100 Lucca, Italy; marco.paggi@imtlucca.it

<sup>8</sup> CNR SCITEC-Istituto di Scienze e Tecnologie Chimiche “Giulio Natta”, Via Fantoli 16/15, 20138 Milano, Italy; marcello.marelli@scitec.cnr.it

\* Correspondence: francesca.bugli@unicatt.it (F.B.); barbara.richichi@unifi.it (B.R.)

† These authors contributed equally to this work.

## Table of content

|           |    |
|-----------|----|
| Figure S1 | S3 |
| Figure S2 | S3 |
| Figure S3 | S4 |
| Figure S4 | S4 |
| Figure S5 | S5 |
| Table S1  | S5 |
| Table S2  | S6 |
| Table S3  | S6 |

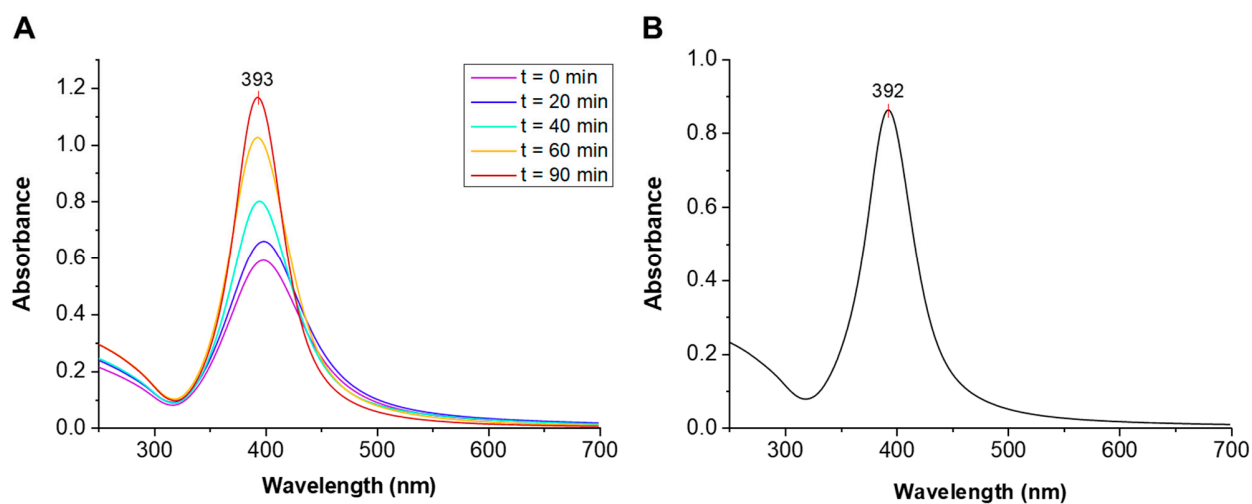

**Figure S1. A.** Overlapped UV-Vis spectra of the reaction mixture over time for the synthesis of **CNC-AgNPs**;  $\lambda_{\text{max}} = 392$  nm; **B.** UV-Vis spectrum of **CNC-AgNPs** (0.13 mg/mL AgNPs in H<sub>2</sub>O);  $\lambda_{\text{max}} = 392$  nm.

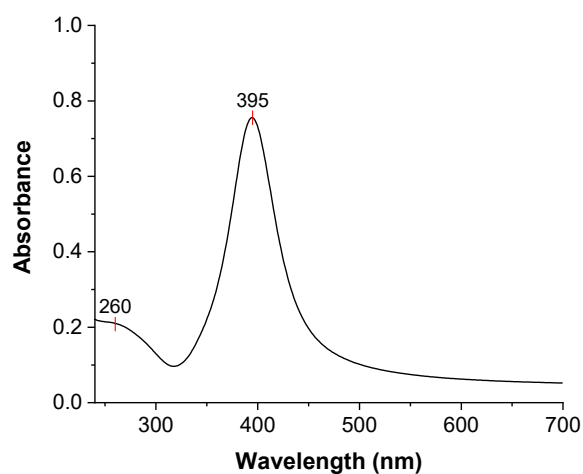

**Figure S2.** UV-Vis spectrum of **rGO-SA-AgNPs**. (0.1 mg/mL in H<sub>2</sub>O);  $\lambda_{\text{max}} = 395$  nm (AgNPs)  $\lambda = 260$  nm (rGO-SA)

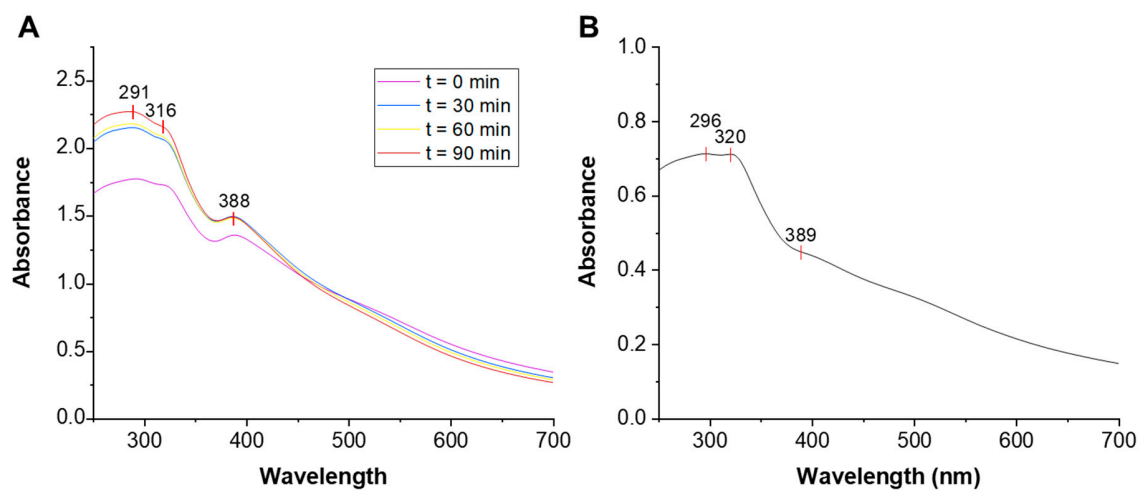

**Figure S3.** A) Overlapped UV-Vis spectra of reaction media for the synthesis of  $\text{TiO}_2\text{-AgNPs}$  (0.1 mg/mL) AgNPs  $\lambda_{\text{max}} = 388$  nm; B) UV-Vis spectrum of  $\text{TiO}_2\text{-AgNPs}$  (0.1 mg/mL) after dialysis (AgNPs,  $\lambda_{\text{max}} = 389$  nm), ( $\text{TiO}_2$ ,  $\lambda_{\text{max}} = 316$  and 291).

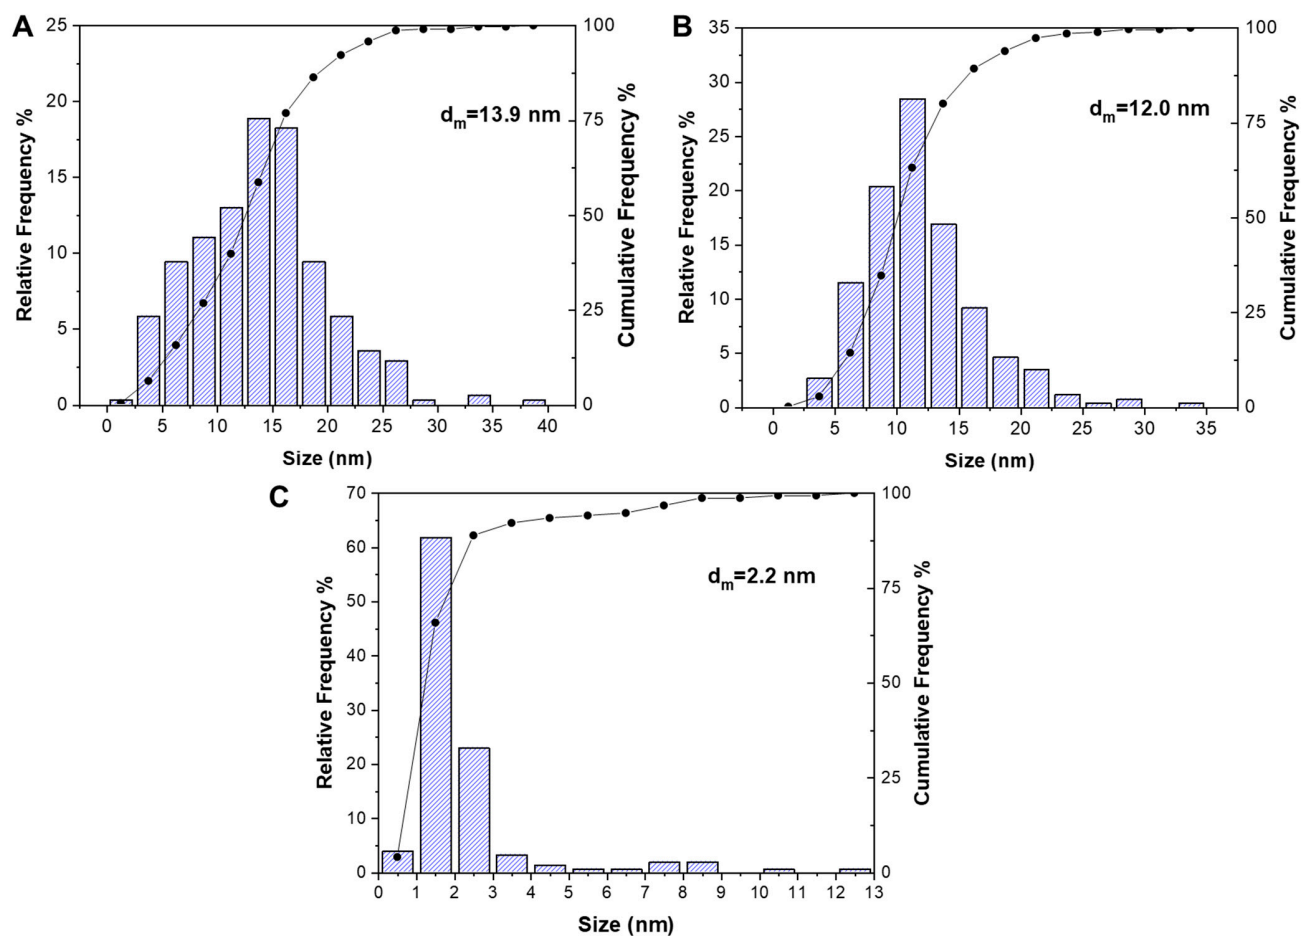

**Figure S4.** Nanoparticles size distribution of: A) **CNC-AgNPs**; B) **rGO-SA-AgNPs**; C) **TiO<sub>2</sub>-AgNPs**.

**Table S1.** AgNPs diameter evaluated by statistical analysis of TEM images ( $d_{\text{TEM}}$ ); crystal size ( $d_{\text{XRD}}$ ) and lattice parameter ( $a$ ) calculated by the XRD pattern fittings.

| AgNPs composites             | $d_{\text{TEM}}$ (nm) <sup>a</sup> | $d_{\text{XRD}}$ (nm) |
|------------------------------|------------------------------------|-----------------------|
| <b>CNC-AgNPs</b>             | $13.93 \pm 0.34$                   | $9.9 \pm 0.7$         |
| <b>rGO-SA-AgNPs</b>          | $4.90 \pm 0.27$                    | $16.2 \pm 0.7$        |
| <b>TiO<sub>2</sub>-AgNPs</b> | $2.2 \pm 0.2$                      | $14.2 \pm 0.7$        |

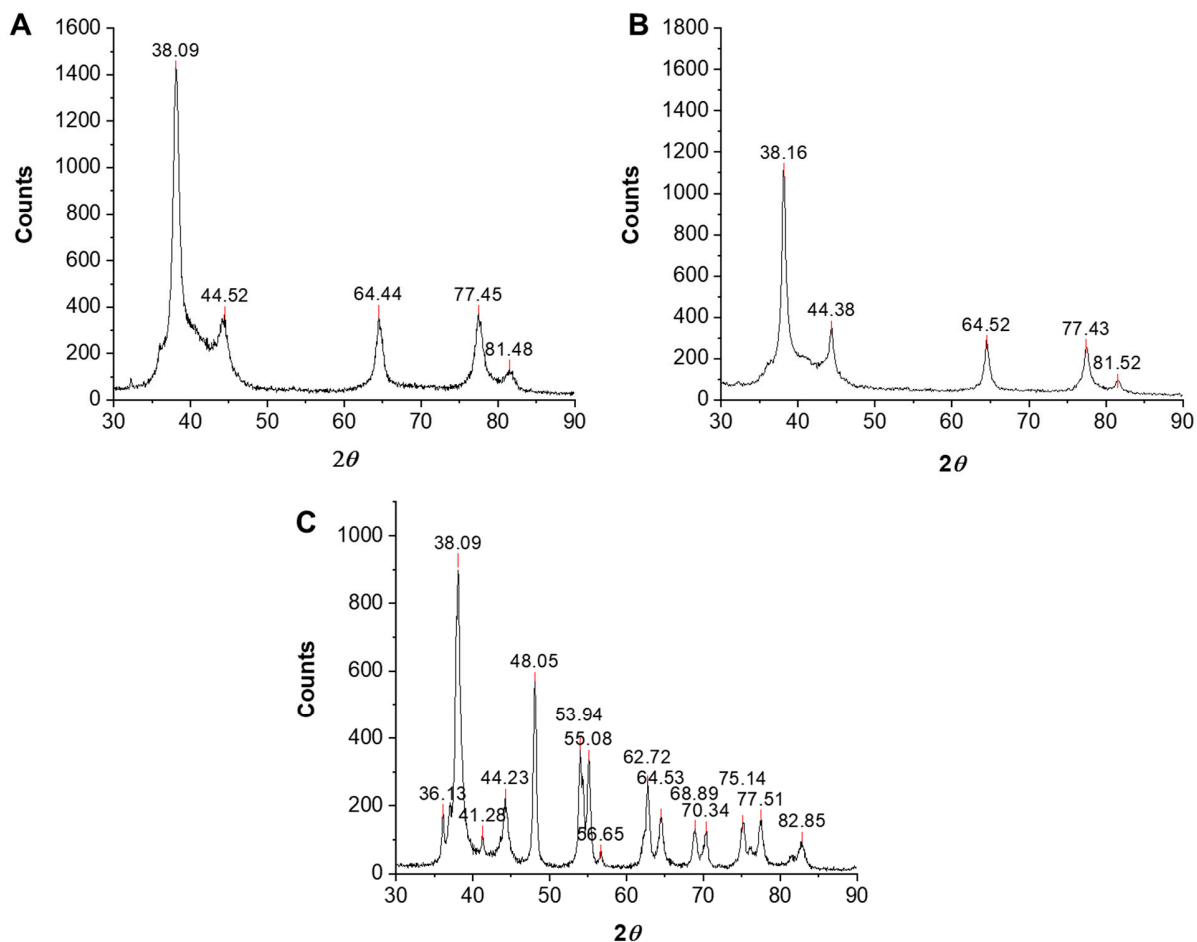

**Figure S5.** XRD spectra of: A) **CNC-AgNPs**, B) **rGO-SA-AgNPs**, C) **TiO<sub>2</sub>-AgNPs**.

**Table S2.** Lattice parameters values (*a* and *c*) and crystal sizes (*d<sub>XRD</sub>*) obtained from the Pawley refinement of the acquired XRD patterns of AgNPs (\*) and TiO<sub>2</sub> (\*\*) mean values and error on the last significant digit reported in brackets.

| AgNPs<br>composites          | <i>a</i> <sup>*</sup> (Å) | <i>d<sub>XRD</sub></i> <sup>*</sup> (nm) | <i>a</i> <sup>**</sup> (Å) | <i>c</i> <sup>**</sup> (Å) | <i>d<sub>XRD</sub></i> <sup>**</sup> (nm) |
|------------------------------|---------------------------|------------------------------------------|----------------------------|----------------------------|-------------------------------------------|
| <b>CNC-AgNPs</b>             | 4.0849(4)                 | 9.9(7)                                   | -                          | -                          | -                                         |
| <b>rGO-SA-AgNPs</b>          | 4.0877(3)                 | 16.2(7)                                  | -                          | -                          | -                                         |
| <b>TiO<sub>2</sub>-AgNPs</b> | 4.0876(3)                 | 14.2(7)                                  | 4.5958(9) <sup>e</sup>     | 2.9568(7) <sup>e</sup>     | 33.3(1) <sup>e</sup>                      |
|                              |                           |                                          | 3.7849(4) <sup>f</sup>     | 9.5082(8) <sup>f</sup>     | 24.4(1) <sup>f</sup>                      |

<sup>e</sup> rutile form; <sup>f</sup> anatase form.

**Table S3.** Silver and titanium content of the nanomaterials measured by ICP-AES and expressed as % w/w.

| <b>AgNPs composites</b>      | <b>Ag <math>\mu\text{g}/\text{mg}</math></b> | <b>Ag % w/w</b> | <b>Ti <math>\mu\text{g}/\text{mg}</math></b> | <b>Ti % w/w</b> |
|------------------------------|----------------------------------------------|-----------------|----------------------------------------------|-----------------|
| <b>CNC-AgNPs</b>             | 445.66                                       | 44.6            | -                                            | -               |
| <b>rGO-SA-AgNPs</b>          | 1.89                                         | 18.9            | -                                            | -               |
| <b>TiO<sub>2</sub>-AgNPs</b> | 89.4                                         | 8.9             | 145.74                                       | 14.6            |
